# 1 Many rice genes are differentially spliced between roots and shoots but cytokinin hormone 2 application has minimal effect on splicing

3  
4 Nowlan Freese<sup>1\*</sup>, April R. Estrada<sup>1\*</sup>, Ivory C. Blakley<sup>1</sup>, Jinjie Duan<sup>2</sup>, Ann Loraine<sup>1\*\*</sup>

5 <sup>1</sup>Department of Bioinformatics and Genomics, University of North Carolina at Charlotte, Charlotte, NC,  
6 USA

7 <sup>2</sup>Bioinformatics Research Center, Aarhus University, C.F. Moellers Alle 8, Aarhus C, Denmark.  
8

9 \*Equal contribution.

10 \*\*Corresponding author.

## 11 12 **ABSTRACT**

13 Alternatively spliced genes produce multiple spliced isoforms, called transcript variants. In differential  
14 alternative splicing, the relative abundance of transcript variants differs across sample types. Differential  
15 alternative splicing is common in animal systems and influences cellular development in many processes,  
16 but its extent and significance is not as well known in plants. To investigate alternative splicing in plants,  
17 we examined rice seedling RNA-Seq data that included approximately 40 million sequence alignments  
18 per library, three libraries per sample type, and four sample types: roots and shoots, each treated with  
19 exogenous cytokinin delivered hydroponically, plus mock-treated controls. Cytokinin treatment triggered  
20 expression changes in thousands of genes, but had minimal effect on alternative splicing. However, there  
21 were many splicing differences between roots and shoots. Analysis of a similar (but less deeply  
22 sequenced) mRNA-Seq data set from Arabidopsis showed the same pattern. Quantitative fragment  
23 analysis of reverse transcriptase-PCR products made from newly prepared rice samples confirmed nine of  
24 ten differential splicing events between rice roots and shoots. In both the Arabidopsis and rice mRNA-  
25 Seq data sets, most genes annotated as alternatively spliced had small minor variant frequencies, i.e., the  
26 less frequently observed forms were supported by fewer than 20% of informative mRNA-Seq sequences.  
27 Of splicing choices where there was more abundant support for minor forms, most alternative splicing  
28 events were located within the protein-coding sequence and also maintained the annotated reading frame.  
29 A tool for visualizing protein annotations in the context of genomic sequence (ProtAnnot) together with a  
30 genome browser (Integrated Genome Browser) were used to visualize and assess effects of differential  
31 splicing on gene function. In general, differentially spliced regions coincided with conserved regions in  
32 the encoded proteins, indicating that differential alternative splicing is likely to affect protein function  
33 between root and shoot tissue in rice.  
34

## 35 **INTRODUCTION**

36 Differential splicing of pre-mRNA transcripts, called alternative splicing, enables one gene to  
37 produce multiple transcript variants encoding different functions. Alternative splicing is an almost  
38 universal phenomenon in higher eukaryotes, occurring to varying degrees in every animal and plant  
39 genome examined to date [1,2]. In animals, differential expression of splice variants has been recruited as  
40 a regulatory mechanism in multiple processes, such as sex determination in invertebrates and neuronal  
41 differentiation in mammals [2-4].

42 In plants, less is known about the functional significance and patterns of alternative splicing.  
43 However, several trends are apparent. Genes involved in circadian regulation are highly alternatively  
44 spliced, often producing multiple splice variants that fluctuate in concert with day/night cycling along  
45 with overall transcript abundance [5]. The SR family of RNA-binding, splicing regulatory proteins is  
46 greatly expanded compared to mammals and includes many plant-specific forms [6-9]. SR transcripts  
47 themselves are also highly alternatively spliced in plants, with the relative abundance of these alternative  
48 transcripts varying according to environmental stresses and hormones [6,10-13].

49 A growing body of evidence indicates that cell and tissue specific regulation of alternative splicing  
50 occurs in plants, but its significance and extent is not well established [14-16]. We previously found  
51 through analysis of RNA-Seq data from *Arabidopsis* pollen that the relative abundance of splice variants

52 was similar between leaves and pollen, despite the differences between the two tissues [17]. However,  
53 this latter analysis was limited by having just one biological replicate for pollen and only two biological  
54 replicates for leaves. A more comprehensive analysis of multiple *Arabidopsis* data sets found a high  
55 incidence of isoform switching, in which the identity of the most prevalent variant differs between sample  
56 types [18]. However, this splicing diversity may have arisen in part from the heterogeneity of the data sets  
57 used, which were produced using rapidly changing (and improving) sequencing technologies at different  
58 times by different groups.

59 In this study, we used a well-replicated RNA-Seq data set from rice to re-examine prevalence of  
60 alternative splicing between tissues and hormone (cytokinin) treatment. This data set was previously  
61 generated to investigate cytokinin regulation of gene expression in roots and shoots from 10-day old rice  
62 seedlings [19]. The same study also produced an analogous data set from *Arabidopsis* for comparison, but  
63 was less deeply sequenced. Both the rice and *Arabidopsis* mRNA-Seq data sets included three biological  
64 replicates per sample type and four sample types – roots and shoots treated with exogenous cytokinin or a  
65 mock, vehicle-only treatment. In both data sets, the treatment triggered differential expression of  
66 thousands of genes, with roots affected to a greater degree than shoots.

67 For most alternatively spliced genes, regardless of whether or not they were differentially spliced, the  
68 relative abundance of splicing forms was highly skewed, with most alternatively spliced genes producing  
69 one major isoform. Nonetheless, there was a large minority of alternatively spliced genes where minor  
70 isoforms were more abundant and therefore seemed likely to affect gene function. We found that the  
71 relative abundance of splice variants for most alternatively spliced genes was stable, with very few  
72 differentially spliced genes between cytokinin treated and control samples. By contrast, many more genes  
73 were differentially spliced between roots and shoot, and most differential splicing occurred within the  
74 protein-coding sequence. These results provide new evidence that differential alternative splicing likely  
75 contributes to gene function diversification between roots and shoots while playing little role in cytokinin  
76 signaling.

## 77 78 **MATERIALS & METHODS**

### 79 80 **RNA-Seq library preparation and sequencing**

81 Rice and *Arabidopsis* samples were prepared and sequenced as described in [19]. Rice seedlings  
82 (Nipponbare) were grown hydroponically for ten days in a growth chamber set to 14 hours light (28°C)  
83 and 8 hours of dark (23°C) with light intensity  $700 \text{ mmol m}^{-2} \text{ s}^{-1}$ . Around six to ten seedlings were grown  
84 in the same pot, in four pots. On the tenth day, culture media was replaced with new media containing 5  
85 mM of the cytokinin benzyladenine (BA) or 0.05 mN NaOH as a control. After 120 minutes, roots and  
86 shoots were harvested separately. Roots and shoots from treatment or control pots were pooled to form  
87 three replicates per treatment. RNA was extracted and used to synthesize twelve libraries from BA-treated  
88 and mock-treated roots and shoots. Libraries were sequenced on an Illumina HiSeq instrument for 100  
89 cycles, yielding 100 base, single end reads. Sequence data are available from the Sequence Read Archive  
90 under accession SRP04905. Aligned, processed data are available from the Oct. 2011 rice genome  
91 assembly IgbQuickload directories at <http://www.igbquickload.org>.

92 *Arabidopsis* plants were grown vertically on IX MS agar with 1% sucrose for ten days under  
93 continuous illumination in a temperature-controlled growth chamber (Raines et al., 2016). BA was  
94 applied to ten-day-old plants by immersing seedlings in MS solution containing 5 mM BA or vehicle  
95 control and gently shaken for two hours. Plants were harvested, and shoots and roots were collected  
96 separately. Libraries were sequenced on an Illumina HiSeq 2000 instrument for 100x2 cycles, yielding  
97 100 base, paired end reads, to a depth of around 10 million sequenced fragments per library. Sequence  
98 data are available from the Sequence Read Archive under accession SRP059384. Aligned, processed data  
99 are available from the TAIR10 (June 2009) *Arabidopsis* genome assembly IgbQuickload directories at  
100 <http://lorainelab-quickload.scidas.org/maseq/>.

### 101 102 **Data processing**

103 Rice sequences were aligned onto the *O. sativa japonica* genome assembly Os-Nipponbare-  
104 Reference-IRGSP-1.0 [20] and Arabidopsis sequences were aligned onto the TAIR10 June 2009 release  
105 of the Arabidopsis genome (the latest) using TopHat and BowTie2 with maximum intron size was set to  
106 5,000 bases. A command-line, Java program called “FindJunctions” was used to identify exon-exon  
107 junctions from gapped read alignments in the RNA-Seq data. FindJunctions produces BED format files  
108 containing junction features, and the score field of the BED file lists the number of read alignments that  
109 supported the junction. Only reads that aligned to a unique location in the genome were considered.  
110 Source code and compiled versions of FindJunctions are available from  
111 <https://bitbucket.org/lorainelab/findjunctions>.

112

### 113 **Identification of alternative splicing events and differential splicing**

114 To date, there have been two major releases of *O. sativa japonica* gene models: the MSU7 gene set  
115 [20] and the RAP-Db gene set [21]. The two gene model sets contain mostly the same data, but the MSU7  
116 gene models appear to be the most heavily used and annotated with Gene Ontology terms. For simplicity,  
117 and to take advantage of available functional annotations, we used the MSU7 annotations here. For  
118 analysis of Arabidopsis data, we used TAIR10 and Araport11 gene models.

119 Annotated alternative splicing events and the number of reads supporting each alternative were  
120 identified using the exon-intron overlap method described in [22]. Exons and introns from pairs of gene  
121 models from the same locus were compared to identify alternatively spliced regions. Regions where an  
122 intron in one model overlapped an exon in another model on the same strand were identified and used to  
123 define mutually exclusive splicing choices (Figure 1). Gene models that included an alternatively spliced  
124 region were designated the “L” form (for “Long”) with respect to the splicing choice. Likewise, models  
125 that lacked an alternatively spliced region were designated “S” (for “Short”). Alternatively spliced regions  
126 were labeled according to the type of alternative splicing, as follows. Regions flanked by alternative  
127 donor sites were designated “DS” for alternative donor site. Regions flanked by alternative acceptor sites  
128 were labeled “AS” for alternative acceptor site. AS and DS events that coincided with exon skipping were  
129 labeled “AS/ES” and “DS/ES”. Alternatively spliced regions arising from introns that the spliceosome  
130 sometimes failed to excise were designated “RI” for retained intron.

131 For each alternatively spliced region representing two mutually exclusive splicing choices, RNA-Seq  
132 read alignments that unambiguously supported one or the other splicing choice were counted. For AS and  
133 DS events, only gapped reads that aligned across intron junctions were counted as support. For RI events,  
134 gapped reads that aligned across the retained intron were counted as support for the intron-removed (S)  
135 form, and un-gapped reads that overlapped at least 20 bases within the intron were counted as support for  
136 the intron-retained (L) form.

137 For each alternatively spliced region in each biological replicate, the number of reads supporting L or  
138 S, but not both, were used to calculate percent-spliced-in (PSI) as  $N/M*100$ , where N was the number of  
139 reads supporting the L form and M was the number of reads that supported S or L but not both. This is the  
140 same as the splicing index described in [23]. To identify differentially spliced regions, a two-sided t-test  
141 was used to compare PSI between sample types. Because PSI variance was large for events with small M  
142 (very few informative reads), only alternatively spliced regions where M was 10 or more in at least three  
143 replicate libraries were tested. A false discovery rate (FDR) was calculated for each test using the method  
144 of Benjamini and Hochberg, as implemented in the R programming language “p.adjust” method.  
145 Alternative splicing events with FDR less than or equal to 0.1 were considered differentially alternatively  
146 spliced.

147 Software used to identify and quantify alternative events is available from  
148 <https://bitbucket.org/lorainelab/altspliceanalysis>. Data analysis code used to analyze RNA-Seq data is  
149 available from <https://bitbucket.org/lorainelab/ricealtsplice>. Data analysis code is implemented as R  
150 Markdown files designed to be run in the RStudio development environment. Readers interested in  
151 experimenting with different analysis parameters can clone the repository, modify the code, and re-run  
152 analyses as desired. RNA-Seq alignments, coverage graphs, and junctions data are available for  
153 visualization in Integrated Genome Browser.

154  
155  
156  
157  
158  
159  
160  
161  
162  
163  
164  
165  
166  
167  
168  
169  
170  
171  
172  
173  
174  
175  
176  
177  
178  
179  
180  
181  
182  
183  
184  
185  
186  
187  
188  
189  
190  
191  
192  
193  
194  
195  
196  
197  
198  
199  
200  
201  
202  
203  
204

## **RT-PCR and capillary gel electrophoresis analysis of alternative splicing**

Differential alternative splicing detected by analysis of RNA-Seq was re-tested using the reverse transcriptase, PCR-based fragment analysis method described in [24]. Differentially spliced regions identified computationally were PCR-amplified using fluorescently labeled primers and quantified using capillary gel electrophoresis. One benefit of the method is that the results are expressed as relative abundances of splice variants within a sample, thus eliminating the need to normalize using reference genes as in traditional qRT-PCR experiments aimed at measuring overall gene expression.

For splicing validation, new rice seedlings equivalent to the mock-treated (control) samples from the RNA-Seq experiment were grown and harvested. Seedlings were grown hydroponically in pots containing either liquid media only or calcined clay granules watered with liquid media as recommended in [25]. After twelve days, plants were removed from the pots and roots and shoots were collected separately. Roots and shoots from the same pot were combined to form paired biological replicates. Samples were frozen on liquid nitrogen and stored at -80 degrees C prior to RNA extraction.

RNA was extracted using the RNeasy Plant Mini Kit from Qiagen following the manufacturer's instructions. First strand cDNA was synthesized using oligo dT primers and 1 µg of total RNA per 20 µL reaction. PCR amplification of cDNA was performed using primers flanking differentially spliced regions, including one primer labeled with 6-carboxyfluorescein (6-FAM) for amplicon detection during fragment analysis. Cycle parameters included denaturation at 94°C for 2 minutes, followed by 24 cycles of 94°C for 15 sec, 50°C for 30 sec and 70°C for 1 min, with a final elongation step of 72°C for 10 minutes. This was essentially the same regime described in [24] but with fewer cycles to ensure reactions were stopped before exiting the logarithmic phase. PCR products were combined with size standards and separated on a 3730 Genetic Analyzer (Life Technologies). Amplicons were quantified using manufacturer-provided software by calculating the area under each amplicon peak. The percentage of the variant containing the alternatively spliced region (%L, see above) was calculated by dividing the long form area by the total area for both long and short forms. Spreadsheets with data exported from the instrument, along with PSI calculations, are available in the project git repository in a subfolder named "Experimental Testing."

## **RESULTS**

### **Most genes annotated as alternatively spliced favored one dominant isoform**

Using the exon-intron overlap method described previously [22], alternative splicing events within each gene were identified and annotated as shown in Figure 1. Following annotation of alternative splicing events, RNA-Seq read alignments from the rice and Arabidopsis libraries described in [19] were used to assess alternative splicing in four sample types: roots and shoots from seedlings treated with the cytokinin compound benzyladenine (BA) or with a mock, control treatment. For each alternative splicing event, the number of sequence alignments unambiguously supporting each alternative was counted. These counts were used to calculate percent-spliced-in (PSI), the percentage of read alignments supporting the longer (L) isoform.

In the combined data from all libraries from the rice data set, 77% of AS events had at least one read supporting each of the two splicing choices, and 19.8% had support for just one splicing choice. Only 2.8% of AS events has no reads supporting either form; these corresponded to genes with low or no expression in any of the sample types tested.

In the rice mRNA-Seq data set, most genes annotated as alternatively spliced had small minor variant frequencies, i.e., the less frequently observed forms were supported by fewer than 20% of informative mRNA-Seq sequences (Figure 2). Nevertheless, there was a large minority of alternative splicing events (around one third) where the minor, less-frequently observed form was more abundant and was supported by at least two out of ten informative alignments. These alternatively spliced regions correspond to the middle, trough-like region of Figure 2.

## 205 **Rice genes with abundant support for both alternative splicing choices exhibit a variety of functions**

206 We used Gene Ontology term enrichment to determine if the subset of genes in rice for which  
207 alternatively spliced forms were unusually abundant exhibited enrichment with specific functions or  
208 processes, e.g., circadian cycling, in which alternative splicing might play a prominent regulatory.  
209 Specifically, we asked if some Gene Ontology terms were significantly enriched with genes containing  
210 alternative splicing events in which the minor form frequency was between 20 and 50%, corresponding to  
211 the central trough region of Figure 2. Interestingly, we found that these genes exhibited a diversity of  
212 gene functions, with no significant enrichment of functional categories. Thus, alternative splicing in  
213 which minor forms are highly prevalent appears to affect genes with many functions in rice.  
214

## 215 **Many rice genes are differentially spliced between roots and shoots but cytokinin hormone 216 application has minimal effect on splicing**

217 In animals, differential splicing between cell or tissue types contributes to cellular differentiation,  
218 especially in the nervous system [26]. Less is known about the role of alternative splicing in regulating  
219 cellular differentiation and other processes in plants. Rice shoots and roots are profoundly different  
220 tissues, but our previous analysis of this same data set found that many of the same genes were expressed  
221 in both [19]. This raises the question of how these two different tissues are able to carry out their  
222 specialized roles, and suggest the hypothesis that differential splicing could enable differential functions  
223 in genes expressed in both tissues, as proposed in [1].

224 Analysis of the effects of cytokinin treatment on this same data set from rice identified many  
225 thousands of genes of that were differentially expressed in response to cytokinin [19]. However, little is  
226 known about the role alternative splicing during cytokinin response, except for one study in *Arabidopsis*  
227 that reported a shift in splicing of SR protein genes following cytokinin hormone treatment [11].  
228 Therefore, we examined differential splicing in the rice RNA-Seq data set comparing root and shoot  
229 tissue with or without cytokinin.

230 First, we asked: When an alternatively spliced gene was expressed in two different sample types, was  
231 the relative abundance of splice variants the same or different? To address this, we examined correlation  
232 of PSI between roots and shoots or between BA-treated versus mock-treated samples (Figure 3). We  
233 found that PSI was similar between treated and untreated samples, as revealed by the tighter clustering of  
234 scatter plot points in Figures 3A and 3B. This indicated that genes that were alternatively spliced in BA-  
235 treated samples were also alternatively spliced in the controls, and that the relative abundance of splice  
236 variants was similar. Thus, the cytokinin hormone treatment had minimal effect on splicing. By contrast,  
237 there were many genes where the relative abundance of splice variants was different between roots and  
238 shoots (Figure 3C). Consistent with Figure 3, statistical testing of PSI differences between sample types  
239 identified 90 genes where PSI was significantly different between roots and shoots ( $FDR \leq 0.1$ ) but only  
240 four and two genes where PSI was different between cytokinin-treated samples and controls in roots and  
241 shoots, respectively (See Supplemental Data I). Thus, we observed limited but non-trivial levels of  
242 differential alternative splicing between roots and shoots but minimal differential alternative splicing  
243 between control and BA-treated samples.  
244

## 245 **Comparison of *Arabidopsis* differential splicing shows similar patterns to rice**

246 To determine whether the observed patterns of differential splicing are similar in other plants, we  
247 analyzed splicing in *Arabidopsis* roots and shoots that had also been treated with cytokinin [19]. Due to  
248 the *Arabidopsis* libraries not being sequenced to the same depth as the rice libraries, many more splicing  
249 events had little or no support. However, PSI was distributed similarly to rice in that most alternatively  
250 spliced genes expressed on major isoform (Supplemental Figure 1A). In addition, scatter plots showing  
251 average PSI in treated versus untreated samples showed a much tighter cluster of points as compared to  
252 scatter plot comparing roots and shoots (Supplemental Figure 1B). Thus, the cytokinin hormone  
253 treatment had minimal effect on splicing in *Arabidopsis*. Statistical testing of PSI differences confirmed  
254 this trend. Using the same FDR threshold as with the rice data set ( $FDR \leq 0.1$ ), we identified few  
255 differentially spliced regions between shoots and roots (3) and none in the control to treatment

256 comparisons. Thus, the general pattern of more differential splicing between tissue types as compared to  
257 treatment with exogenous cytokinin appeared conserved between rice and *Arabidopsis*.

258

### 259 **Alternative splicing remodeled protein-coding sequence more often than disrupting it in rice**

260 Alternative splicing can occur within the UTR or protein-coding regions of genes. Interestingly, 67%  
261 of the differential splicing between roots and shoots occurred within protein-coding regions (Table I and  
262 Supplemental Data I), suggesting that differential splicing is likely to affect gene function at the level of  
263 the protein product. In nearly every instance, major and minor isoforms were both detected, with  
264 differential splicing observed as a change in the relative abundance of the two forms.

265 In general, when alternatively spliced regions overlap the coding region of genes and the lengths of  
266 these regions are not multiples of three, then inclusion of these differential regions in transcripts is likely  
267 to introduce a frame shift, resulting in a premature stop codon and a truncated protein product. As shown  
268 in Table I, there was an enrichment of alternatively spliced regions in rice that were evenly divisible by  
269 three in coding regions versus non-coding in all subsets of the data. These subsets included all annotated  
270 alternatively spliced regions, regions where the minor form was unusually prevalent (the trough region of  
271 Figure 2), and differentially spliced regions. Thus, alternative splicing within the coding regions of genes  
272 was biased against introducing frame shifts and promoted protein remodeling rather than truncation.

273 To further understand the effects of splicing on protein-coding sequences, we visualized differentially  
274 spliced regions together with RNA-Seq alignments, coverage graphs, and inferred junctions using  
275 genome browsers. Two genome browsers were used to visualize the data - Integrated Genome Browser  
276 [27] and ProtAnnot [28]. Integrated Genome Browser (IGB) was used to examine RNA-Seq read  
277 alignments and compare alignments to the annotated gene structures. ProtAnnot, an IGB App, was used  
278 to search the InterPro database of conserved protein motifs to find out how (or if) splicing inferred from  
279 RNA-Seq data was likely to affect gene function through remodeling of protein motifs as detected by the  
280 InterProScan Web service [29].

281 Of the 105 differentially spliced regions, 71 overlapped protein-coding sequence regions, suggesting  
282 that in these cases, alternative splicing affected protein function. All but one (70/71) of the differentially  
283 spliced regions embedded in coding regions overlapped a predicted functional motif (e.g., a predicted  
284 transmembrane helix) or a region found by protein classification systems (e.g., Pfam [30] or PANTHER  
285 [31]) to be conserved among members of the same protein family (Supplemental Data I and Figure 4).

286

### 287 **RT-PCR with capillary gel electrophoresis confirmed differential splicing between rice roots and 288 shoots for nine of ten genes tested**

289 We used a method based on capillary gel electrophoresis of fluorescently tagged PCR products to  
290 assay alternative splicing of ten genes detected as differentially spliced between rice roots and shoots  
291 [24]. New rice seedlings were grown under a close-to-identical replication of the RNA-Seq experiment.  
292 Primers were designed to amplify differentially spliced regions, including one primer that was conjugated  
293 to a fluorescent tag. Following PCR amplification of cDNA prepared from the new rice samples, products  
294 were resolved on a capillary-based sequencer and PSI calculated (Table II). In nine out of ten genes,  
295 differential alternative splicing was confirmed. In the one case where differential alternative splicing was  
296 not confirmed, there were very few RNA-Seq read alignments covering the differentially spliced region,  
297 suggesting this was likely a false positive result. The FDR cutoff used to detect differential splicing in the  
298 RNA-Seq data was 0.1, corresponding to 1 in 10 false discoveries, in line with results from the  
299 microcapillary-based analysis.

300

## 301 **DISCUSSION**

302 This study profiled alternative splicing using a high coverage RNA-Seq data from 10-day old,  
303 hydroponically-grown rice seedlings treated with a cytokinin hormone. A less-deeply sequenced data set  
304 from similarly treated *Arabidopsis* seedlings provided a comparison. We found that cytokinin treatment  
305 induced very few splicing changes between treated and untreated controls. However, there were many

306 differences in splicing between untreated roots and shoots, and most of these changed the protein coding  
307 region of genes.

308 Palusa et al. found that BA-treatment of *Arabidopsis* seedlings triggered splicing changes in multiple  
309 SR genes [11], encoding RNA-binding proteins whose counterparts in metazoans regulated alternative  
310 splice site choice. Their study used PCR amplification of cDNA followed by agarose gel electrophoresis  
311 to detect changes in splicing and focused on SR protein genes only. Thus, we expected to observe  
312 changes in SR gene splicing due to the cytokinin treatment, leading to changes in splicing for many  
313 downstream genes. However, no such differential splicing was apparent in either RNA-Seq data set  
314 tested. It is possible that the differences in methodology used to measure splicing changes between the  
315 two studies (RNA-Seq versus visualization of PCR amplification of cDNA) could account for the  
316 differences in observations. However, close examination of SR splicing genes in our dataset revealed no  
317 significant differences.

318 One possible explanation of why the cytokinin treatment had minimal effect on splicing was that the  
319 treatment itself was ineffective. However, differential expression analysis showed that many genes were  
320 up- or down- regulated by the treatment in the two data sets tested – rice and *Arabidopsis* [19]. Fewer  
321 genes were detected as differentially expressed in the *Arabidopsis* data set, most likely reflecting higher  
322 variability between biological replicates combined with lower sequencing depth as compared to the rice  
323 data set. Nevertheless, known cytokinin sensitive genes were regulated in both data sets, showing the  
324 cytokinin treatment penetrated plant cells and induced stereotypical cytokinin signaling without also  
325 triggering changes in splicing.

326 The relative lack of differential splicing between cytokinin-treated and mock-treated samples suggests  
327 that cytokinin signaling does not employ alternative splicing as a regulatory mechanism to the same  
328 degree as with other plant hormones, notably abscisic acid (ABA). ABA plays a role in perception and  
329 response to stresses, especially desiccation stress [32]. ABA also plays a role in regulating splicing of  
330 SR45, an SR-like protein, and SR45 plays a role in regulating downstream splicing of multiple genes  
331 [33]. Thus, there is a clear connection between stress signaling and the plant stress hormone ABA.

332 By contrast, cytokinin signaling involves transfer of phosphate groups between successive elements  
333 of a phosphorelay signaling pathway culminating in phosphorylation-dependent activation of Myb-type  
334 transcription factor proteins called type B ARR. Cytokinin treatment has no or little effect on  
335 transcription of type B ARRs, the key regulators of cytokinin signaling [34,35]. In addition, type B  
336 transcriptional regulators are not highly alternatively spliced. By contrast, a closely related family of  
337 similar genes encoding so-called “pseudo-response regulators” have similar sequence to type B ARRs and  
338 are highly alternatively spliced [36]. These genes are involved in regulating the circadian clock and have  
339 nothing to do with cytokinin signaling.

340 Using the same methods and data set, we identified a relatively large number of genes in rice (90) that  
341 were differentially spliced genes between shoots and roots, and we validated nine of ten using fragment  
342 analysis and an independent data set. This observation of differential splicing between roots and shoots is  
343 important for two key reasons. First, it shows that our data analysis methods can identify differential  
344 alternative splicing in a data set. In other words, the roots versus shoots comparison provided a positive  
345 control for differential splicing detection. Second, the detection of differential splicing between roots and  
346 shoots illuminates the function of alternative splicing in plant cells. For most of the differentially spliced  
347 regions, both forms were present, and the difference in relative abundance between forms was often  
348 slight, rarely more than 5 or 10% (Supplemental Data I). Our data supports the growing body of evidence  
349 that alternative splicing is cell, tissue, and stage specific in plants [14-16,37], including in roots [38]. It is  
350 likely that alternative splicing plays a role in fine-tuning gene function to meet the needs of different plant  
351 tissues or cell types where a gene is expressed.

352 We also examined the prevalence of alternative splicing, independent from differential splicing. That  
353 is, we used RNA-Seq read alignments to assess how often annotated alternative splice sites were used in  
354 our RNA-Seq data sets. For most genes annotated as alternatively spliced, the minor form frequency was  
355 typically low, accounting for less than 20% of sequence read alignments across the differentially spliced  
356 region. Genes where minor form frequency exceeded 20% exhibited a diversity of functions. Thus, many

357 diverse processes in rice involved alternatively spliced genes in which splice variants were expressed at  
358 levels likely to affect gene function.

359 A major limitation of this study was that we limited our analysis to annotated splice forms and did not  
360 attempt to form new transcript models based on the RNA-Seq data. This was done mainly because the  
361 libraries used were not strand-specific and attempts to assemble transcripts using transcript assembly tools  
362 led to incorrect fusion of neighboring genes and other artifacts (not shown). Future studies will therefore  
363 benefit greatly from using better library preparation protocols to simplify and streamline data analysis.  
364 Nonetheless, this analysis provides new insight into the role of alternative splicing in plant tissues and  
365 hormone response.

366

### 367 **CONCLUSION**

368 By analyzing the number of reads that supported different splice variants, we identified examples of  
369 differential splicing with confirmation by RT-PCR with capillary gel electrophoresis. There were 90  
370 genes differentially spliced between rice root and shoot tissues, but only four between cytokinin-treated  
371 and non-treated samples. For most differential splicing events, the protein-coding regions were affected,  
372 strongly suggesting that differential splicing is playing a role in modulating gene function between roots  
373 and shoots.

374

### 375 **FUNDING AND SUPPORT**

376 This material is based upon work supported by the National Science Foundation through the Postdoctoral  
377 Research Fellowship in Biology under Grant No.1523814 awarded to Nowlan Freese and the Plant  
378 Genome Research Program award number IOS-1238051. NIH award 2R01GM103463-06A1 to AL  
379 supports development of the IGB software.



380 **Table I.** Alternative splicing choices producing difference regions evenly divisible by three or with  
381 remainder of 1 or 2. P-value obtained from a binomial test of the null hypothesis that the true probability  
382 of a differentially spliced region having a length divisible by three is 1 in 3 and an alternative hypothesis  
383 that the probability is greater than 1 in 3.  
384

| Alternative Splicing |                                    | Divisible<br>by 3 | Remainder<br>of 1 | Remainder<br>of 2 | P-value |
|----------------------|------------------------------------|-------------------|-------------------|-------------------|---------|
| Location             | Event                              |                   |                   |                   |         |
| Coding region        | Annotated as alternatively spliced | 3,248             | 2,466             | 2,411             | 3e-36   |
| UTR                  | Annotated as alternatively spliced | 1,152             | 1,127             | 1,113             | 1       |
| Coding region        | Minor form is expressed            | 173               | 149               | 153               | 8e-6    |
| UTR                  | Minor form is expressed            | 34                | 20                | 13                | 0.03    |
| Coding region        | Differentially spliced             | 33                | 24                | 18                | 0.03    |
| UTR                  | Differentially spliced             | 6                 | 5                 | 11                | 0.79    |

385

386 **Table II.** Differential splicing detected using RNA-Seq and re-tested using capillary gel electrophoresis  
 387 (CGE). P is the p-value obtained from comparing roots and shoots PSI from CGE.  
 388

| Gene ID        | Description                      | AS type | Avg. RPKM Expression |       | RNA-Seq PSI (%L) |       | CGE PSI (%L) |       | P-value  |
|----------------|----------------------------------|---------|----------------------|-------|------------------|-------|--------------|-------|----------|
|                |                                  |         | Root                 | Shoot | Root             | Shoot | Root         | Shoot |          |
| LOC_Os01g25484 | ferredoxin nitrite reductase     | RI      | 300                  | 131   | 74.2             | 31.7  | 29.9         | 13    | 5e-05    |
| LOC_Os01g35580 | unknown                          | AS      | 55.7                 | 34.9  | 44.0             | 66.3  | 49.9         | 66.9  | 2.47e-04 |
| LOC_Os01g45274 | carbonic anhydrase               | ES      | 171                  | 1,380 | 96.8             | 24.3  | 97.4         | 15.4  | 3e-09    |
| LOC_Os01g51290 | protein kinase                   | RI      | 49.6                 | 49.9  | 88.4             | 95.1  | 13.3         | 17.2  | 0.03466  |
| LOC_Os03g05390 | citrate transporter              | RI      | 219                  | 174   | 86.0             | 96.3  | 86           | 95.5  | 1.2e-04  |
| LOC_Os12g08260 | dehydrogenase E1                 | RI      | 8.03                 | 30.3  | 55.7             | 2.9   | 4.1          | 0.87  | 3e-05    |
| LOC_Os01g61670 | ureidoglycolate hydrolase        | DS      | 59                   | 37.8  | 78.0             | 31.0  | 59           | 37.8  | 1.6e-09  |
| LOC_Os05g48040 | MATE efflux family protein       | DS      | 7.05                 | 6.72  | 88.1             | 100.0 | 89.4         | 88.27 | 0.632    |
| LOC_Os02g05830 | ribulose biphosphate carboxylase | RI      | 4.79                 | 12.3  | 88.2             | 10.1  | 23.9         | 3.06  | 8e-04    |
| LOC_Os06g05110 | superoxide dismutase             | RI      | 12.5                 | 39.7  | 38.5             | 13.6  | 22.7         | 6.5   | 1.3e-07  |

389  
 390

391 **Supplemental Data I.** Excel spreadsheet file (SuppTable\_PSI.xlsx) is provided as a supplement  
392 containing the rice mock root vs mock shoot, mock root vs treated root, and mock shoot vs treated shoot  
393 splicing data. It is available from the “Manuscript” folder in the project source code repository  
394 (<https://bitbucket.org/lorainelab/ricealtsplice>). The spreadsheet contains output of R script  
395 SplicingAnalysis.Rmd run with “coverage\_threshold” parameter set to 10, where coverage\_threshold is  
396 the number of reads overlapping a differentially spliced region which supports one or the other splicing  
397 choice when comparing mutually exclusive splicing choices. The R script resides in the project source  
398 code repository in the “AltSplice” subfolder. Data files produced by the script reside in subfolder  
399 “AltSplice/results”. The spreadsheet SuppTable\_PSI.xlsx contains worksheets copied from script output  
400 files rootsVshoots\_MSU7\_10.xlsx, roots\_MSU7\_10.xlsx, and shoots\_MSU7\_10.xlsx. The worksheet  
401 comparing roots and shoots alternative splicing (from rootsVshoots\_MSU7\_10.xlsx) was edited by hand  
402 to include information obtained from manual examination of differentially spliced genes and regions  
403 using Integrated Genome Browser and ProtAnnot. A key describing each column and its meaning is also  
404 included. The first column of each data worksheet contains hyperlinked alternatively spliced region  
405 identifiers. To use the hyperlinks, users should first download and launch Integrated Genome Browser  
406 from <http://bioviz.org>. Clicking the links sends a message to Integrated Genome Browser instructing it to  
407 zoom and scroll to the alternatively spliced region. Users can then open and view RNA-Seq data sets from  
408 the study by selecting the RNA-Seq folder in the **Available Data Sets** section of the IGB **Data Access**  
409 tab.  
410

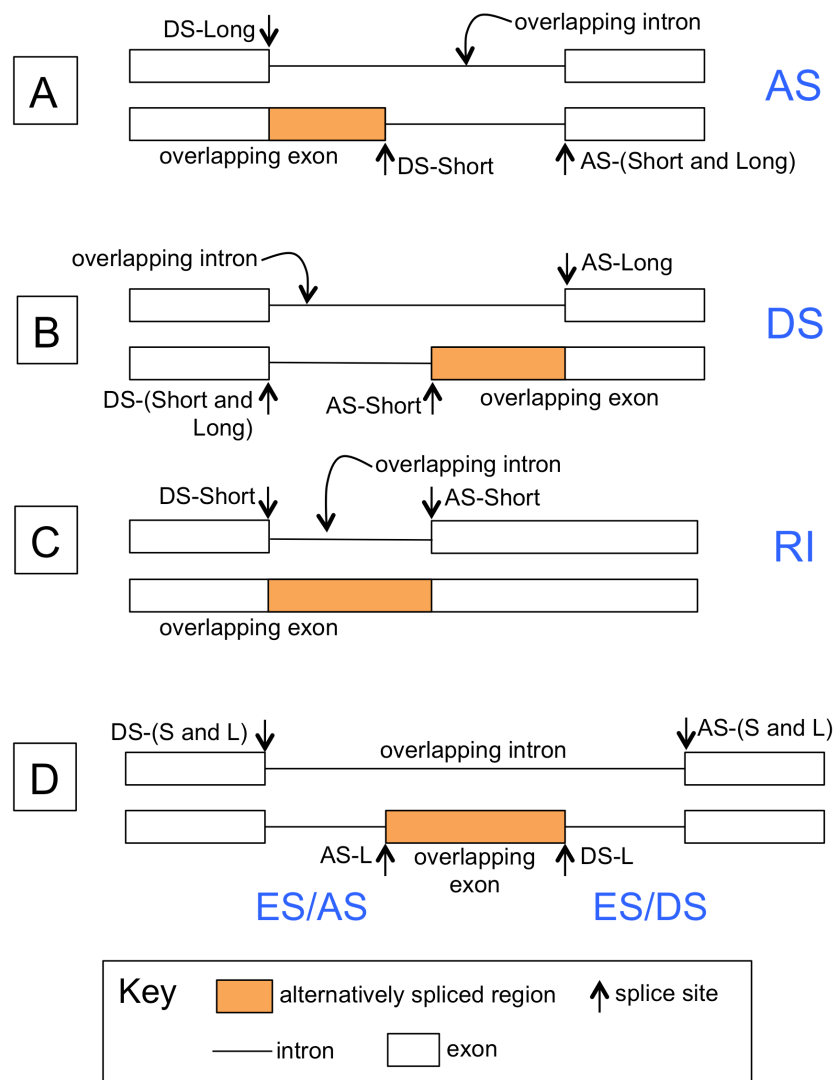

411  
 412 **Figure 1. Alternative splicing annotation.** The overlap between an intron in one gene model and an  
 413 exon in another gene model defines an alternatively spliced region. Arrows indicate splice sites, named  
 414 AS for acceptor site and DS for donor site. Use of sites named AS-L or DS-L causes inclusion of the  
 415 differentially spliced region, generating the longer (L) isoform. Similarly, DS-S and AS-S refer to sites  
 416 that exclude the differentially spliced region and generate the shorter (S) isoform. **(A)** Alternative donor  
 417 sites, in which the U2 snRNP complex forms at alternative locations on the 5' end of introns. **(B)**  
 418 Alternative acceptor sites, in which the U1 snRNP complex forms at alternative sites near the 3' end of  
 419 alternatively spliced introns. **(C)** Alternatively spliced intron, in which a donor/acceptor site pairing can  
 420 either be used or not used, forming a retained intron (RI). **(D)** Alternatively spliced, skipped exon. In  
 421 exon skipping, alternative splicing involves four sites, indicated by DS-S/L, AS-L, DS-L, and SD-S/L.  
 422 Exon inclusion requires assembly of two spliceosome complexes linking DS-S/L with AS-L and DS-L  
 423 with AS-S/L, while exon skipping requires linking DS-S/L and AS-S/L only.  
 424

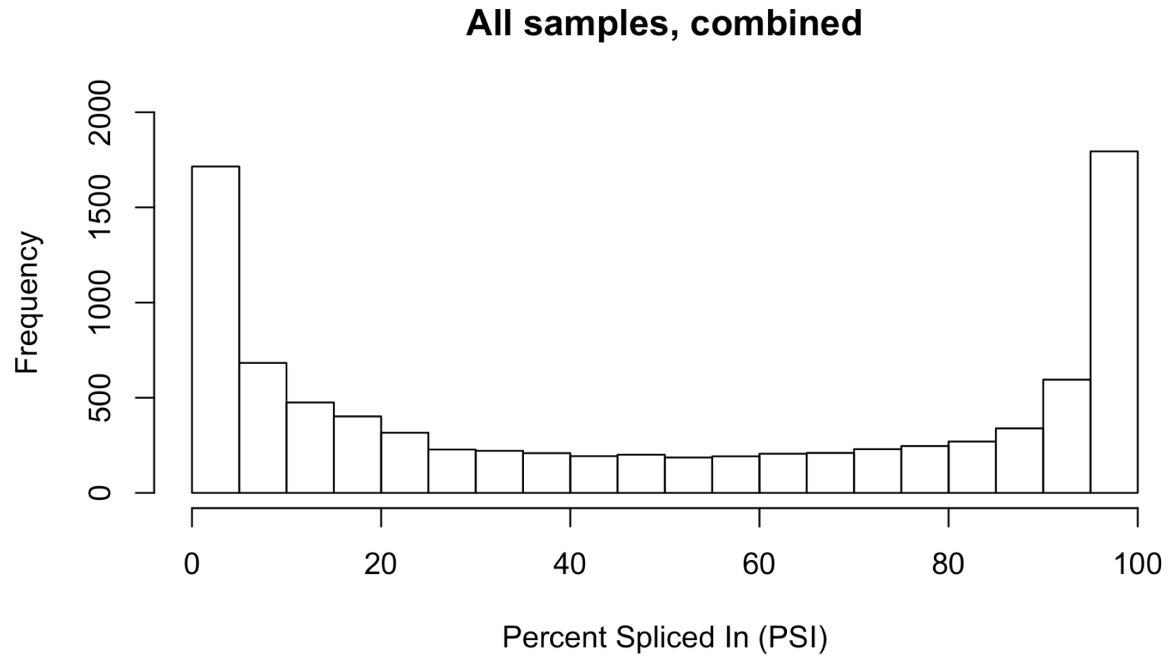

425  
426 **Figure 2. Distribution of percent-spliced-in (PSI) for annotated splicing events in rice where each**  
427 **choice was supported by at least one RNA-Seq alignment.** PSI was calculated as  $100 \cdot L / (S + L)$ , where  
428 L and S were the number of reads that supported the splicing choice that included (L) or excluded (S) the  
429 differentially spliced region. Read alignment counts from all twelve libraries were combined to obtain a  
430 global view of alternative splicing occurrence in rice seedlings. The U-shaped character of the distribution  
431 persisted whether lower or higher thresholds of informative reads were used.  
432

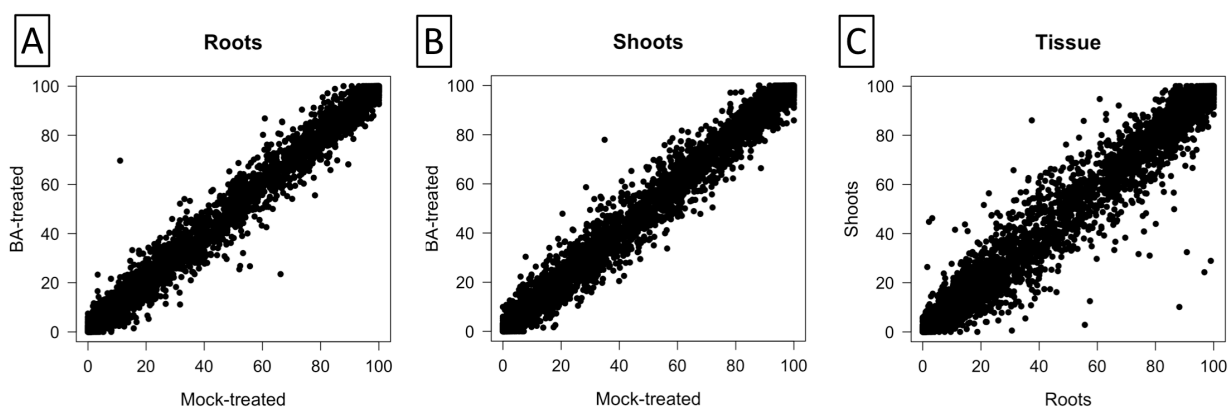

433  
434 **Figure 3. Scatter plots comparing percent- spliced-in (PSI) between sample types in rice for**  
435 **annotated splicing events.** PSI was calculated from RNA-Seq reads obtained from sequencing rice  
436 seedling shoots and roots grown hydroponically and subjected to a two-hour treatment with BA, a  
437 cytokinin analog, or a mock-treatment (control). PSI is the average of three biological replicates. Only  
438 events with at least 15 informative read alignments in all six samples being compared were included. (A)  
439 BA-treated rice roots (y axis) compared to mock roots (x axis). (B) BA-treated rice shoots (y axis)  
440 compared to mock shoots (x axis). (C) Mock shoots (y axis) compared to mock roots (x axis)  
441

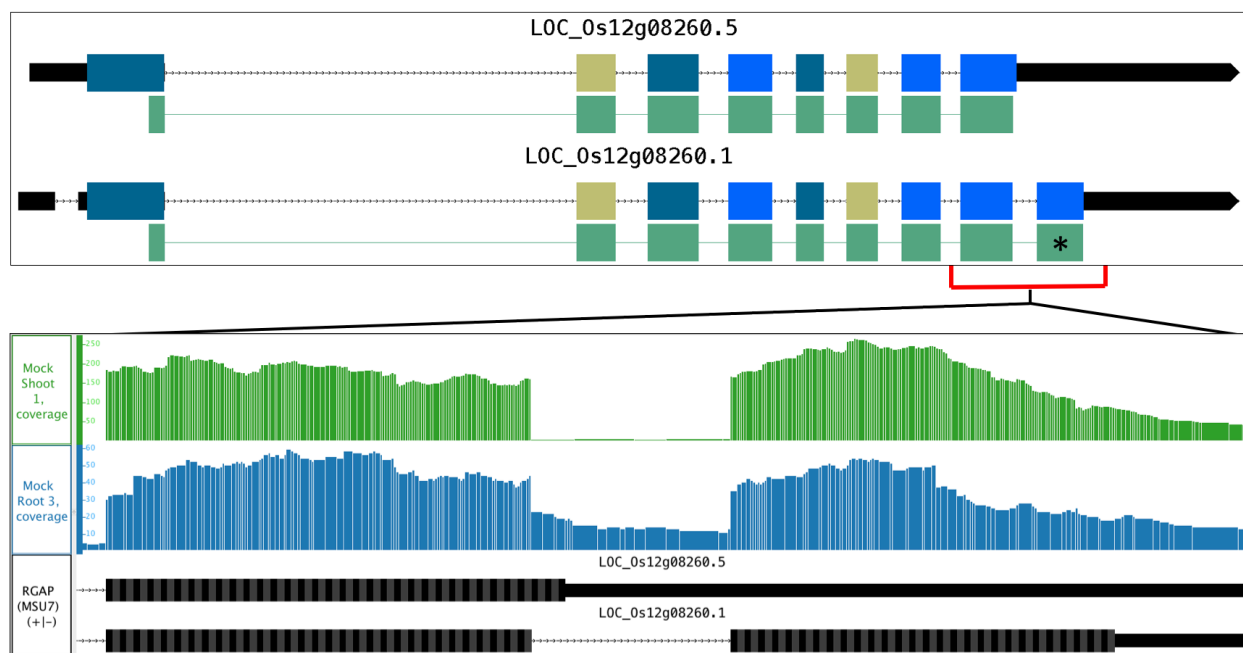

442  
443  
444  
445  
446  
447  
448  
449  
450  
451

**Figure 4. ProtAnnot and IGB images showing difference in splicing between rice shoot and root.**

ProtAnnot (upper panel) shows coding region exons color-coded by frame, with regions matching InterPro profiles indicated by green, linked rectangles. Asterisk highlights difference in the PANTHER InterPro profile PTHR11516 between isoforms 1 and 5 of the LOC\_Os12g08260 gene. Integrated Genome Browser (lower panels) shows a zoomed-in view of RNA-Seq coverage graphs from rice root (blue) and shoot (green). Y-axis is the number of RNA-Seq aligned sequences with MSU7 gene models in black below.

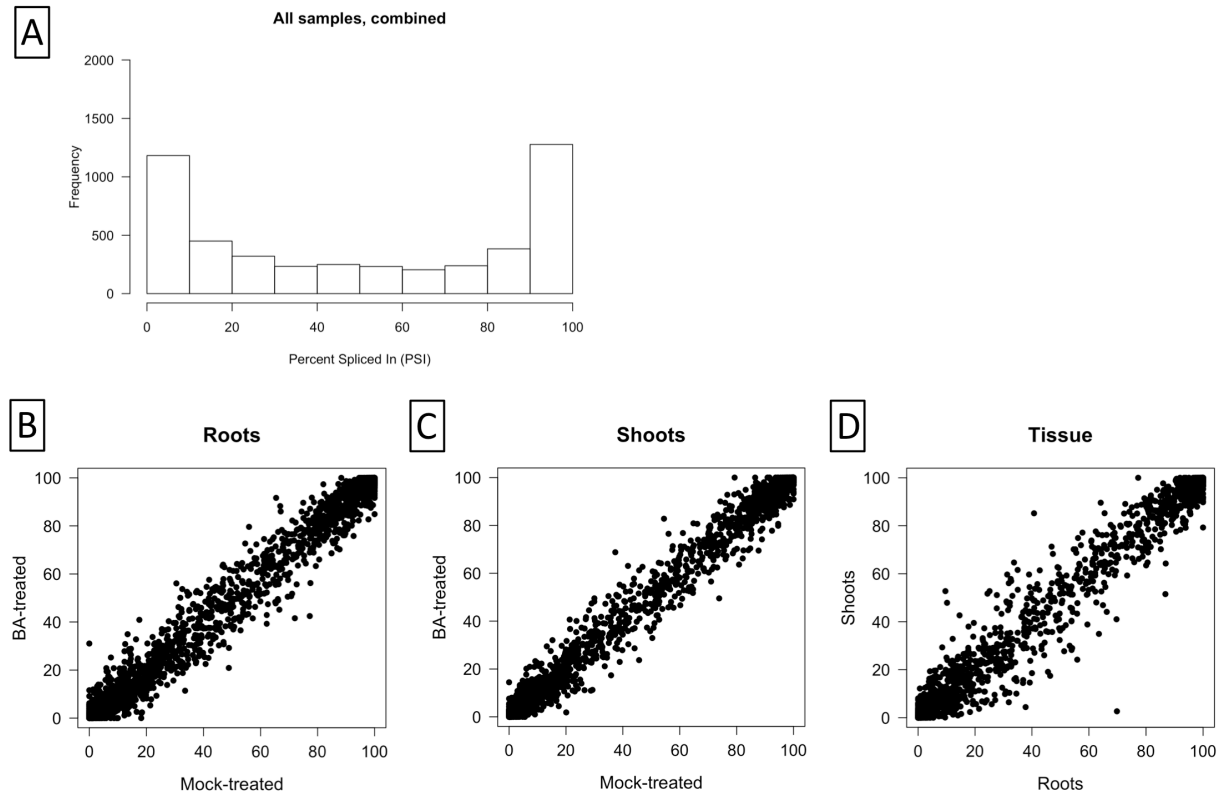

452  
453  
454  
455  
456  
457  
458  
459  
460  
461  
462  
463

**Supplemental Figure 1. Percent-spliced-in (PSI) in Arabidopsis RNA-Seq data set between sample types for annotated splicing events in *Arabidopsis*.** PSI was calculated from RNA-Seq reads obtained from sequencing *Arabidopsis* seedling shoots and roots grown hydroponically and subjected to a two-hour treatment with BA, a cytokinin analog, or a mock-treatment (control). PSI is the average of three biological replicates. Only events with at least 10 informative read alignments in all six samples being compared were included. (B) BA-treated *Arabidopsis* roots (y axis) compared to mock roots (x axis). (C) BA-treated *Arabidopsis* shoots (y axis) compared to mock shoots (x axis). (D) Mock shoots (y axis) compared to mock roots (x axis).



464  
465  
466  
467  
468  
469  
470  
471  
472  
473  
474  
475  
476  
477  
478  
479  
480  
481  
482  
483  
484  
485  
486  
487  
488  
489  
490  
491  
492  
493  
494  
495  
496  
497  
498  
499  
500  
501  
502  
503  
504  
505  
506  
507  
508

## REFERENCES CITED

1. Reddy ASN, Marquez Y, Kalyna M, Barta A (2013) Complexity of the Alternative Splicing Landscape in Plants. *The Plant Cell* 25: 3657-3683.
2. Kalsotra A, Cooper TA (2011) Functional consequences of developmentally regulated alternative splicing. *Nature Reviews Genetics* 12: 715-729.
3. Barbosa-Morais NL, Irimia M, Pan Q, Xiong HY, Gueroussov S, et al. (2012) The evolutionary landscape of alternative splicing in vertebrate species. *Science* 338: 1587-1593.
4. Salz HK (2011) Sex Determination in Insects: a binary decision based on alternative splicing. *Current opinion in genetics & development* 21: 395-400.
5. Filichkin Sergei A, Cumbie Jason S, Dharmawardhana P, Jaiswal P, Chang Jeff H, et al. (2015) Environmental Stresses Modulate Abundance and Timing of Alternatively Spliced Circadian Transcripts in Arabidopsis. *Molecular Plant* 8: 207-227.
6. Filichkin S, Priest HD, Megraw M, Mockler TC (2015) Alternative splicing in plants: directing traffic at the crossroads of adaptation and environmental stress. *Current Opinion in Plant Biology* 24: 125-135.
7. Plass M, Agirre E, Reyes D, Camara F, Eyraas E (2008) Co-evolution of the branch site and SR proteins in eukaryotes. *Trends in Genetics* 24: 590-594.
8. Kalyna M, Barta A (2004) A plethora of plant serine/arginine-rich proteins: redundancy or evolution of novel gene functions? *Biochemical Society transactions* 32: 561-564.
9. Barbosa-Morais NL, Carmo-Fonseca M, Aparício S (2006) Systematic genome-wide annotation of spliceosomal proteins reveals differential gene family expansion. *Genome Research* 16: 66-77.
10. Keller M, Hu Y, Mesihovic A, Fragkostefanakis S, Schleiff E, et al. (2016) Alternative splicing in tomato pollen in response to heat stress. *DNA Research: dsw051*.
11. Palusa SG, Ali GS, Reddy ASN (2007) Alternative splicing of pre-mRNAs of Arabidopsis serine/arginine-rich proteins: regulation by hormones and stresses. *The Plant Journal* 49: 1091-1107.
12. Mei W, Boatwright L, Feng G, Schnable JC, Barbazuk WB (2017) Evolutionarily Conserved Alternative Splicing Across Monocots. *Genetics* 207: 465-480.
13. Gulledge AA, Roberts AD, Vora H, Patel K, Loraine AE (2012) Mining Arabidopsis thaliana RNA-seq data with Integrated Genome Browser reveals stress-induced alternative splicing of the putative splicing regulator SR45a. *American journal of botany* 99: 219-231.
14. Sun Y, Hou H, Song H, Lin K, Zhang Z, et al. (2018) The comparison of alternative splicing among the multiple tissues in cucumber. *BMC Plant Biology* 18: 5.
15. Vitulo N, Forcato C, Carpinelli EC, Telatin A, Campagna D, et al. (2014) A deep survey of alternative splicing in grape reveals changes in the splicing machinery related to tissue, stress condition and genotype. *BMC Plant Biology* 14: 99-99.
16. Li S, Yamada M, Han X, Ohler U, Benfey PN (2016) High resolution expression map of the Arabidopsis root reveals alternative splicing and lincRNA regulation. *Developmental cell* 39: 508-522.
17. Loraine AE, McCormick S, Estrada A, Patel K, Qin P (2013) RNA-seq of Arabidopsis pollen uncovers novel transcription and alternative splicing. *Plant Physiol* 162: 1092-1109.

- 509 18. Vaneechoutte D, Estrada AR, Lin YC, Loraine AE, Vandepoele K (2017) Genome-wide  
510 characterization of differential transcript usage in *Arabidopsis thaliana*. *Plant J* 92: 1218-  
511 1231.
- 512 19. Raines T, Blakley IC, Tsai Y-C, Worthen JM, Franco-Zorrilla JM, et al. (2016)  
513 Characterization of the cytokinin-responsive transcriptome in rice. *BMC Plant Biology*  
514 16: 260.
- 515 20. Kawahara Y, de la Bastide M, Hamilton JP, Kanamori H, McCombie WR, et al. (2013)  
516 Improvement of the *Oryza sativa* Nipponbare reference genome using next generation  
517 sequence and optical map data. *Rice* 6: 1-10.
- 518 21. Sakai H, Lee SS, Tanaka T, Numa H, Kim J, et al. (2013) Rice Annotation Project Database  
519 (RAP-DB): an integrative and interactive database for rice genomics. *Plant Cell Physiol*  
520 54: e6.
- 521 22. English AC, Patel KS, Loraine AE (2010) Prevalence of alternative splicing choices in  
522 *Arabidopsis thaliana*. *BMC Plant Biol* 10: 102.
- 523 23. Katz Y, Wang ET, Airoidi EM, Burge CB (2010) Analysis and design of RNA sequencing  
524 experiments for identifying isoform regulation. *Nat Methods* 7: 1009-1015.
- 525 24. Stamm S, Smith C, Lührmann R (2012) *Alternative pre-mRNA Splicing: Theory and*  
526 *Protocols*: Wiley-Blackwell.
- 527 25. Eddy R, Hahn DT, Moulton T (2012) *Optimizing Greenhouse Rice Production: What Is the*  
528 *Best Root Medium?* *Purdue Methods for Rice Growth*.
- 529 26. Naftelberg S, Schor IE, Ast G, Kornblihtt AR (2015) Regulation of alternative splicing  
530 through coupling with transcription and chromatin structure. *Annual review of*  
531 *biochemistry* 84: 165-198.
- 532 27. Freese NH, Norris DC, Loraine AE (2016) Integrated genome browser: visual analytics  
533 platform for genomics. *Bioinformatics* 32: 2089-2095.
- 534 28. Mall T, Eckstein J, Norris D, Vora H, Freese NH, et al. (2016) ProtAnnot: an App for  
535 Integrated Genome Browser to display how alternative splicing and transcription affect  
536 proteins. *Bioinformatics* 32: 2499-2501.
- 537 29. Finn RD, Attwood TK, Babbitt PC, Bateman A, Bork P, et al. (2017) InterPro in 2017—  
538 beyond protein family and domain annotations. *Nucleic Acids Research* 45: D190-D199.
- 539 30. Finn RD, Coggill P, Eberhardt RY, Eddy SR, Mistry J, et al. (2016) The Pfam protein  
540 families database: towards a more sustainable future. *Nucleic Acids Research* 44: D279-  
541 D285.
- 542 31. Thomas PD, Campbell MJ, Kejariwal A, Mi H, Karlak B, et al. (2003) PANTHER: A  
543 Library of Protein Families and Subfamilies Indexed by Function. *Genome Research* 13:  
544 2129-2141.
- 545 32. Maia J, Dekkers BJ, Dolle MJ, Ligterink W, Hilhorst HW (2014) Abscisic acid (ABA)  
546 sensitivity regulates desiccation tolerance in germinated *Arabidopsis* seeds. *New Phytol*  
547 203: 81-93.
- 548 33. Cruz TM, Carvalho RF, Richardson DN, Duque P (2014) Abscisic acid (ABA) regulation of  
549 *Arabidopsis* SR protein gene expression. *Int J Mol Sci* 15: 17541-17564.
- 550 34. Argyros RD, Mathews DE, Chiang Y-H, Palmer CM, Thibault DM, et al. (2008) Type B  
551 Response Regulators of *Arabidopsis* Play Key Roles in Cytokinin Signaling  
552 and Plant Development. *The Plant Cell* 20: 2102-2116.
- 553 35. Kieber JJ, Schaller GE (2018) Cytokinin signaling in plant development. *Development* 145.

- 554 36. James AB, Syed NH, Bordage S, Marshall J, Nimmo GA, et al. (2012) Alternative splicing  
555 mediates responses of the Arabidopsis circadian clock to temperature changes. *Plant Cell*  
556 24: 961-981.
- 557 37. Gupta V, Estrada AD, Blakley I, Reid R, Patel K, et al. (2015) RNA-Seq analysis and  
558 annotation of a draft blueberry genome assembly identifies candidate genes involved in  
559 fruit ripening, biosynthesis of bioactive compounds, and stage-specific alternative  
560 splicing. *Gigascience* 4: 5.
- 561 38. Li S, Yamada M, Han X, Ohler U, Benfey PN (2016) High-Resolution Expression Map of  
562 the Arabidopsis Root Reveals Alternative Splicing and lincRNA Regulation. *Dev Cell*  
563 39: 508-522.  
564
